# Supplementary material
Source: publisher figshare collection journal article supplement (https://acs.figshare.com/ndownloader/files/4301155)
Supplement: Supplementary file 1 [file 4301155]

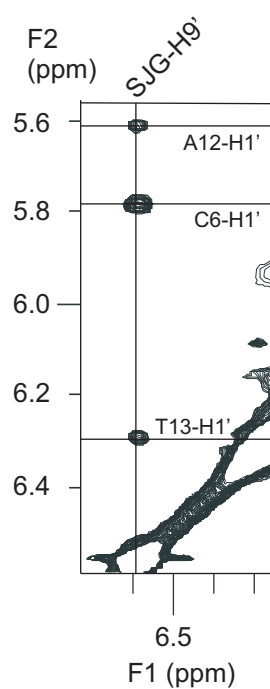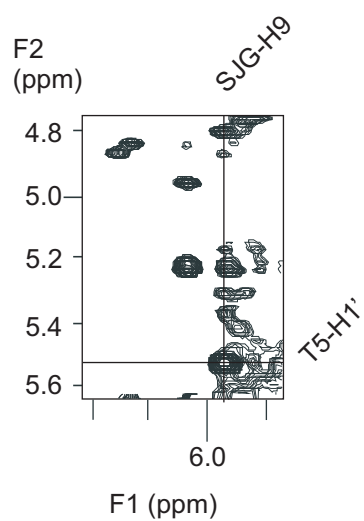

600 MHz 2D NOESY spectrum of 5'*d*(CTCATCAC).(GTGATGAG)-SJG-136, 200 ms mixing time, expansions showing NOE connectivities between SJG-H9 and SJG-H9' and DNA-H1' protons.
